# Supplementary material for: Structural basis for DARC binding in reticulocyte invasion by Plasmodium vivax
Source: PubMed Central journal article supplement (PMC10279640; doi:10.1038/s41467-023-39357-w), 2023-06-19
Supplement: 41467_2023_39357_MOESM1_ESM.pdf [file 41467_2023_39357_MOESM1_ESM.pdf]

## Supplementary Information

### Structural basis for DARC binding in reticulocyte invasion by *Plasmodium vivax*

Re'em Moskovitz<sup>1,†</sup>, Tossapol Pholcharee<sup>1,†</sup>, Sophia M. DonVito<sup>2</sup>, Bora Guloglu<sup>1</sup>,  
Edward Lowe<sup>1</sup>, Franziska Mohring<sup>2</sup>, Robert W. Moon<sup>2</sup> and Matthew K.  
Higgins<sup>1,\*</sup>

<sup>1</sup> Department of Biochemistry, University of Oxford, South Parks Road, Oxford, OX1 3QU, UK

<sup>2</sup> London School of Hygiene and Tropical Medicine, Keppel Street, London, WC1E 7HT, UK

<sup>†</sup> These authors contributed equally

\* Correspondence should be addressed to: [matthew.higgins@bioch.ox.ac.uk](mailto:matthew.higgins@bioch.ox.ac.uk)

**Supplementary Table 1: Crystallographic statistics**

|                                       |                                               |
|---------------------------------------|-----------------------------------------------|
| <b>Data collection</b>                |                                               |
| Space group                           | P2 <sub>1</sub> 2 <sub>1</sub> 2 <sub>1</sub> |
| Cell dimensions:                      |                                               |
| a, b, c (Å)                           | 52.20, 97.95, 287.99                          |
| α, β, γ (°)                           | 90, 90, 90                                    |
| Resolution (Å)                        | 92.73 – 2.49 (2.57 – 2.49)                    |
| Total observations                    | 99952 (8634)                                  |
| Total unique                          | 52982 (4488)                                  |
| R <sub>pim</sub>                      | 0.070 (0.735)                                 |
| CC <sub>1/2</sub>                     | 0.993 (0.463)                                 |
| I/σ(I)                                | 5.7 (0.7)                                     |
| Completeness (%)                      | 100 (100)                                     |
| Multiplicity                          | 1.9 (1.9)                                     |
| Wilson B factor (Å <sup>2</sup> )     | 56.4                                          |
|                                       |                                               |
| <b>Refinement</b>                     |                                               |
| Number of reflections                 | 52884                                         |
| R <sub>work</sub> / R <sub>free</sub> | 0.198 / 0.225                                 |
| Average B factor (Å <sup>2</sup> )    | 67                                            |
| Chain A                               | 72                                            |
| Chain B                               | 85                                            |
| Chain D                               | 52                                            |
| Chain E                               | 58                                            |
| Number of residues:                   |                                               |
| Amino acid residues                   | 760                                           |
| Waters                                | 250                                           |
| RMSZ deviations                       |                                               |
| Bond lengths                          | 0.008                                         |
| Bond angles                           | 0.985                                         |
| Ramachandran plot                     |                                               |
| Favoured (%)                          | 96.3                                          |
| Allowed (%)                           | 3.7                                           |
| Outliers (%)                          | 0                                             |

**Supplementary Table 2: interactions**

| PvDBP-RII |         |            | DARC  |           |            |                     |
|-----------|---------|------------|-------|-----------|------------|---------------------|
| Chain     | Residue | Group      | Chain | Residue   | Group      | Type of interaction |
| B         | L20     | Side chain | A     | V282/Y363 | Side chain | Hydrophobic         |
| B         | F22     | Side chain | A     | Y278/V282 | Side chain | Hydrophobic         |
| B         | D24     | Side chain | A     | Y363      | Side chain | Hydrogen bond       |
| B         | D24     | Side chain | A     | K367      | Side chain | Electrostatic       |
| B         | V25     | Side chain | A     | A281/Y363 | Side chain | Hydrophobic         |
| B         | W26     | Side chain | A     | R274      | Side chain | Cation- $\pi$       |
| B         | S29     | Side chain | A     | Q356      | Side chain | Hydrogen bond       |
| B         | D34     | Side chain | A     | K366      | Side chain | Electrostatic       |
| B         | F36     | Side chain | A     | F373      | Side chain | Hydrophobic         |
| B         | P37     | Main chain | A     | W375      | Main chain | Hydrogen bond       |
| B         | G39     | Main chain | A     | W375      | Main chain | Hydrogen bond       |
| B         | Y41S    | Side chain | A     | K297/I376 | Side chain | Hydrophobic         |
| B         | Y41S    | Side chain | A     | K301/R304 | Side chain | Electrostatic       |
| B         | N44     | Side chain | A     | R294/N296 | Side chain | Hydrogen bond       |
| B         | L45     | Main chain | A     | Y295      | Main chain | Hydrogen bond       |
| B         | A47     | Main chain | A     | Y293      | Main chain | Hydrogen bond       |
| PvDBP-RII |         |            | DB1   |           |            |                     |
| Chain     | Residue | Group      | Chain | Residue   | Group      | Type of interaction |
| A         | N260    | Side chain | D     | S75       | Side chain | Hydrogen bond       |
| A         | F261    | Main chain | D     | N74       | Side chain | Hydrogen bond       |
| A         | F261    | Side chain | D     | Y68       | Side chain | Hydrophobic         |
| A         | H262    | Side chain | C     | Y120      | Main chain | Hydrogen bond       |
| A         | H262    | Side chain | C     | Y51       | Side chain | Hydrogen bond       |
| A         | R263    | Side chain | C     | S122      | Side chain | Hydrogen bond       |
| A         | R333    | Side chain | C     | Y125      | Side chain | Hydrogen bond       |
| A         | I335    | Main chain | C     | Y120      | Side chain | Hydrogen bond       |
| A         | T338    | Main chain | C     | Y127      | Side chain | Hydrogen bond       |
| A         | D339    | Main chain | C     | Y127      | Side chain | Hydrogen bond       |
| A         | D339    | Side chain | C     | Y127      | Side chain | Hydrogen bond       |
| A         | D339    | Side chain | C     | R345      | Side chain | Hydrogen bond       |
| A         | D339    | Side chain | C     | W52       | Side chain | Hydrogen bond       |
| A         | E340    | Side chain | C     | R78       | Side chain | Electrostatic       |
| A         | K341    | Side chain | C     | D74       | Side chain | Electrostatic       |
| A         | K341    | Side chain | C     | D76       | Side chain | Electrostatic       |
| A         | R345    | Side chain | C     | Y71       | Side chain | Hydrogen bond       |

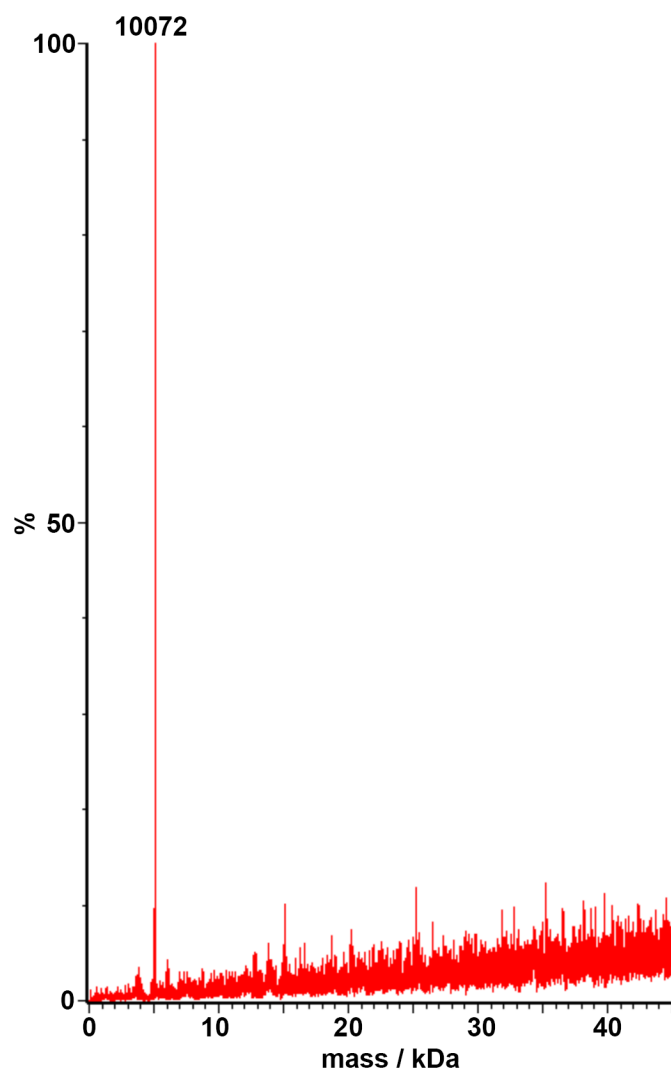

***Supplementary Figure 1: characterisation of DARC peptide***

The DARC peptide expressed in HEK293 cells (TMGNALHRAELSPSTENSSQLDFEDVWNSSY GVNDSFPDGDYDANLEAAAPAHSANLLDDSLVPRGSLNDIFEAQKIEWHEGSHHHHHH) was assessed by mass spectrometry. The mass of the fully-protonated peptide would be 9918 and the mass of 10072 was consistent with a peptide with two modifications by sulphation.

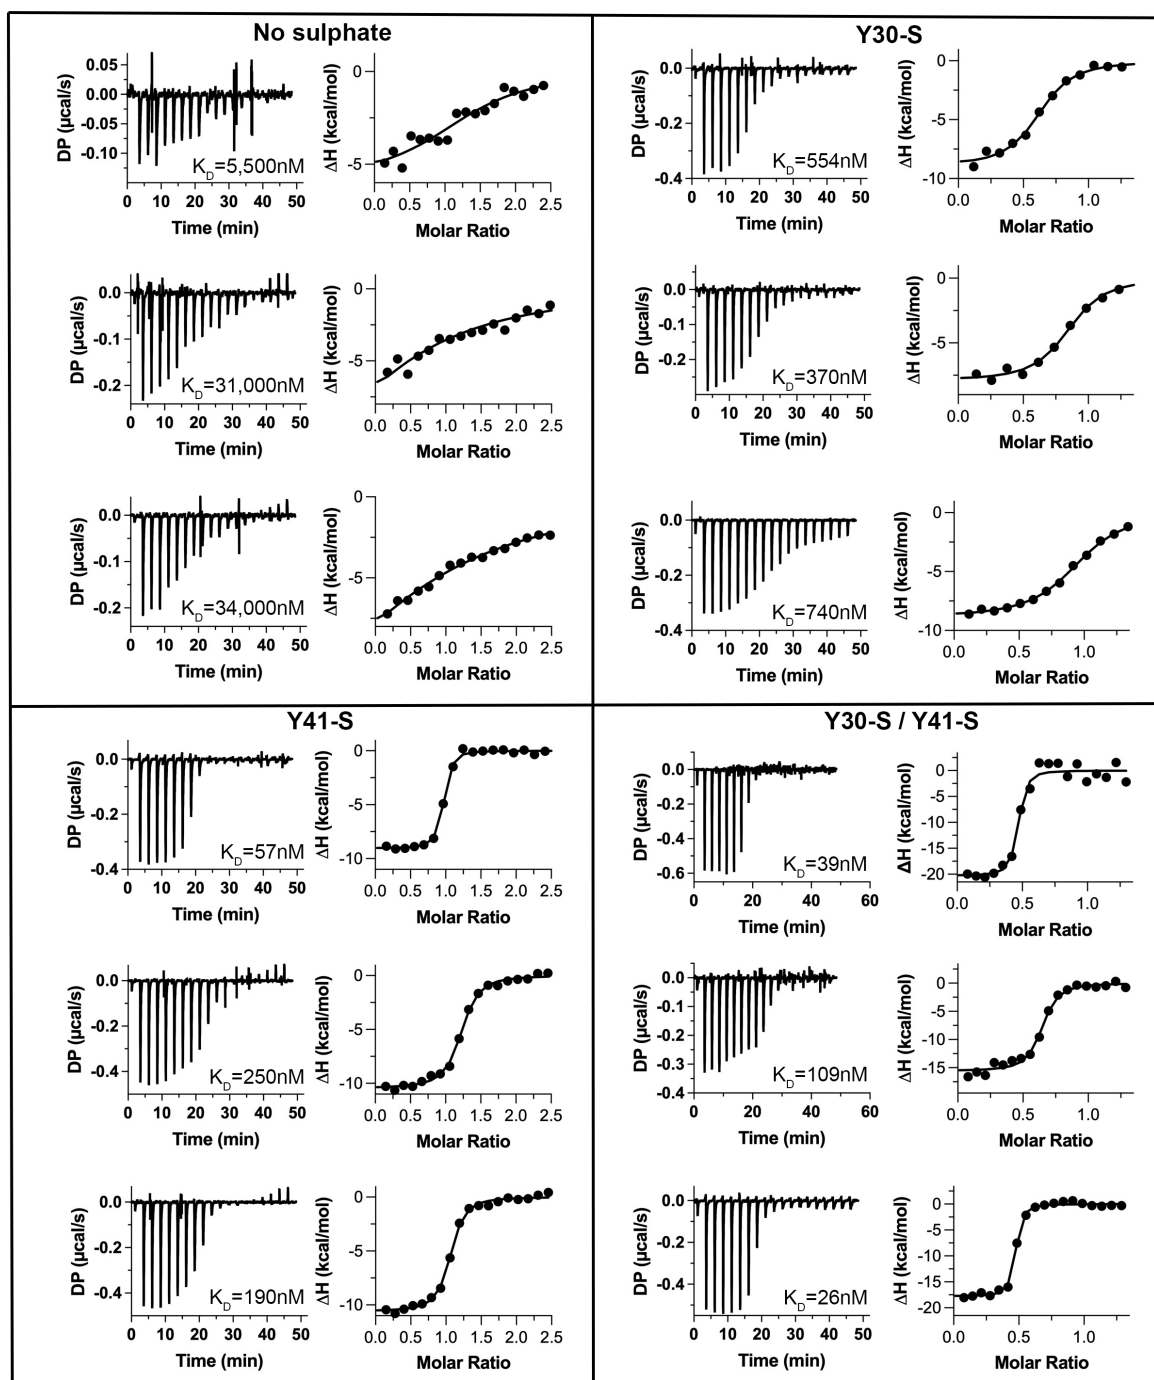

**Supplementary Figure 2: Measurement of affinities of PvDBP-RII for DARC peptides by isothermal titration calorimetry**

In each case, three separate technical replicates were performed and the mean and standard deviation  $K_D$  value was determined. For the non-sulphated peptide, the measured  $K_D$  values were  $5.5 \pm 6.4 \mu\text{M}$ ,  $31 \pm 28 \mu\text{M}$  and  $34 \pm 40 \mu\text{M}$  with the mean of  $23 \pm 16 \mu\text{M}$ . For the Y30-S peptide, the measured  $K_D$  values were  $544 \pm 116 \text{ nM}$ ,  $370 \pm 120 \text{ nM}$  and  $740 \pm 84 \text{ nM}$  with the mean of  $552 \pm 186 \text{ nM}$ . For the Y41-S peptide, the measured  $K_D$  values were  $57 \pm 13 \text{ nM}$ ,  $250 \pm 45 \text{ nM}$  and  $190 \pm 34 \text{ nM}$  with the mean of  $168 \pm 101 \text{ nM}$ . For the Y30-S / Y41-S peptide, the measured  $K_D$  values were  $39 \pm 25 \text{ nM}$ ,  $109 \pm 33 \text{ nM}$  and  $26 \pm 7 \text{ nM}$  with the mean of  $58 \pm 45 \text{ nM}$ . Source data are provided as a Source Data file.

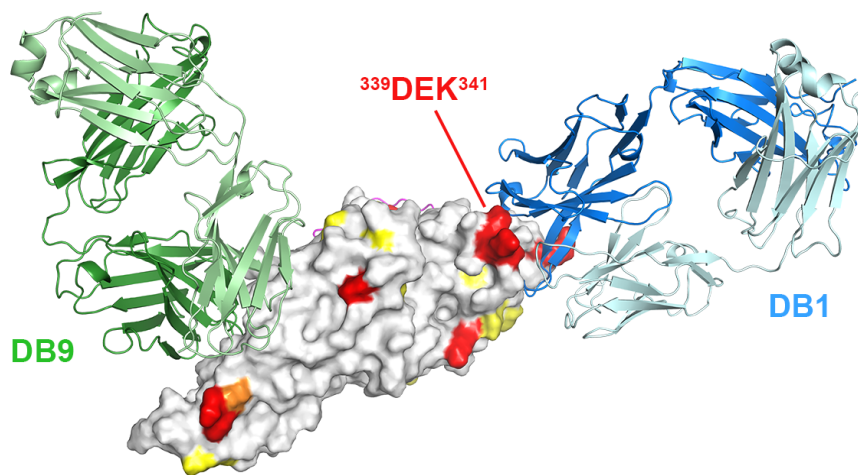

**Supplementary Figure 3: Polymorphism in the epitopes for DB1 and DB9**

The structure of PvDBP-RII is shown in surface representation, which has been coloured according to sequence polymorphism (grey  $< 0.15$ ; yellow = 0.15-0.30; orange = 0.30-0.40 and red  $> 0.4$ ). The Fab fragments of DB9 (green) and DB1 (blue) are shown. DB9 binds to a non-polymorphic site, while DB1 binds directly to the polymorphic  $^{339}\text{DEK}^{341}$  motif.

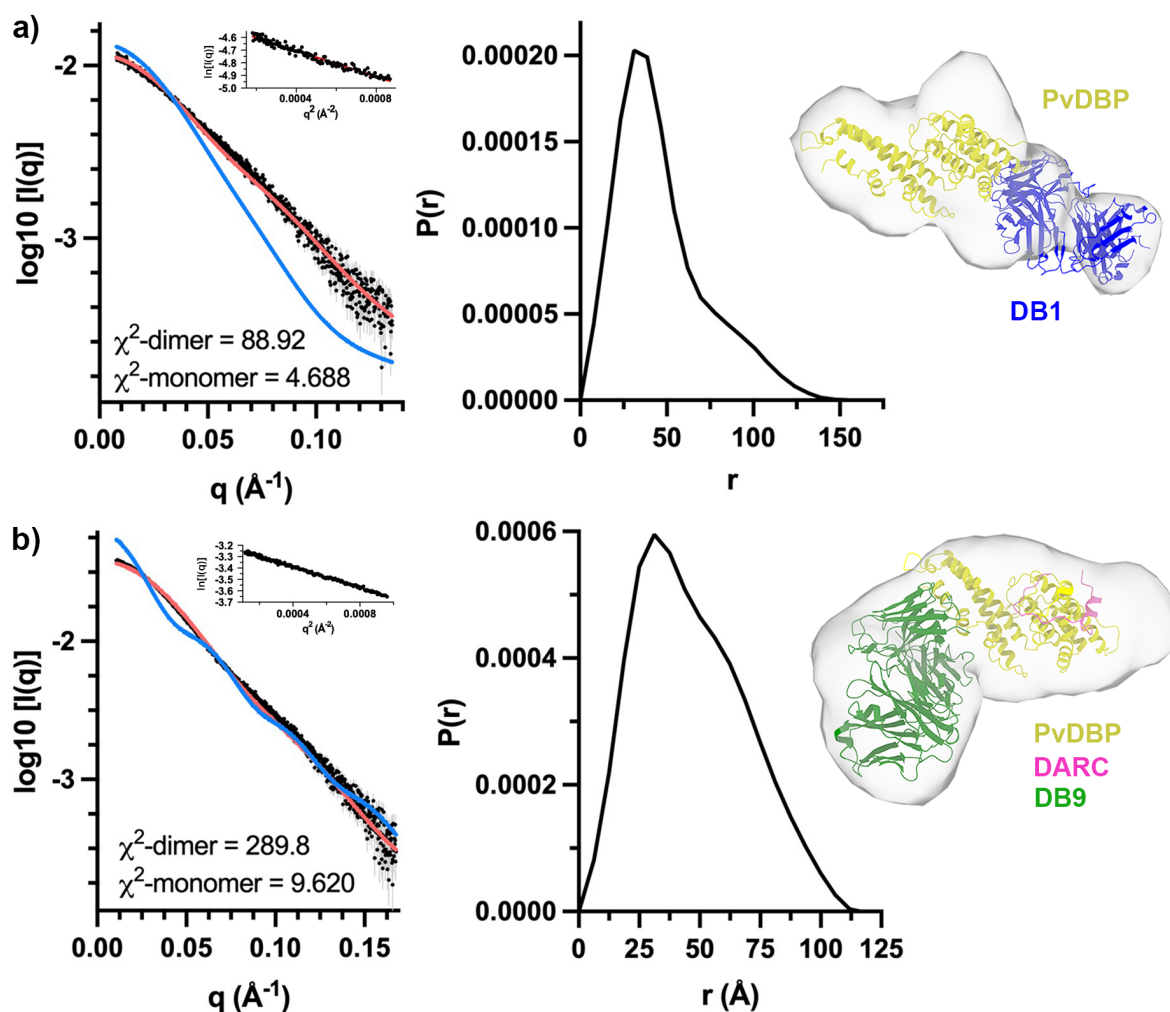

**Supplementary Figure 4: Small angle X-ray scattering data (SEC-SAXS) for PvDBP-RII complexes**

Small angle X-ray scattering data (SEC-SAXS) for **a)** the complex of PvDBP-RII and the Fab fragment of antibody DB1 and **b)** the complex of PvDBP-RII, Y30-S, Y41-S double-sulphated DARC<sub>19-47</sub> and the Fab fragment of antibody DB9. In each case a single sample was studied and the left-hand panel shows the refined scattering data, with black circles representing the mean and error bars representing the standard error after radial averaging of intensities from two-dimensional diffraction data. This has been fitted either with the predicted scattering for the monomeric (red) or dimeric (blue) complex. The inset is the Guinier plot. The central panel shows the pair distance distribution function while the right-hand panel shows the calculated envelope into which has been docked the monomeric model. Source data are provided as a Source Data file.

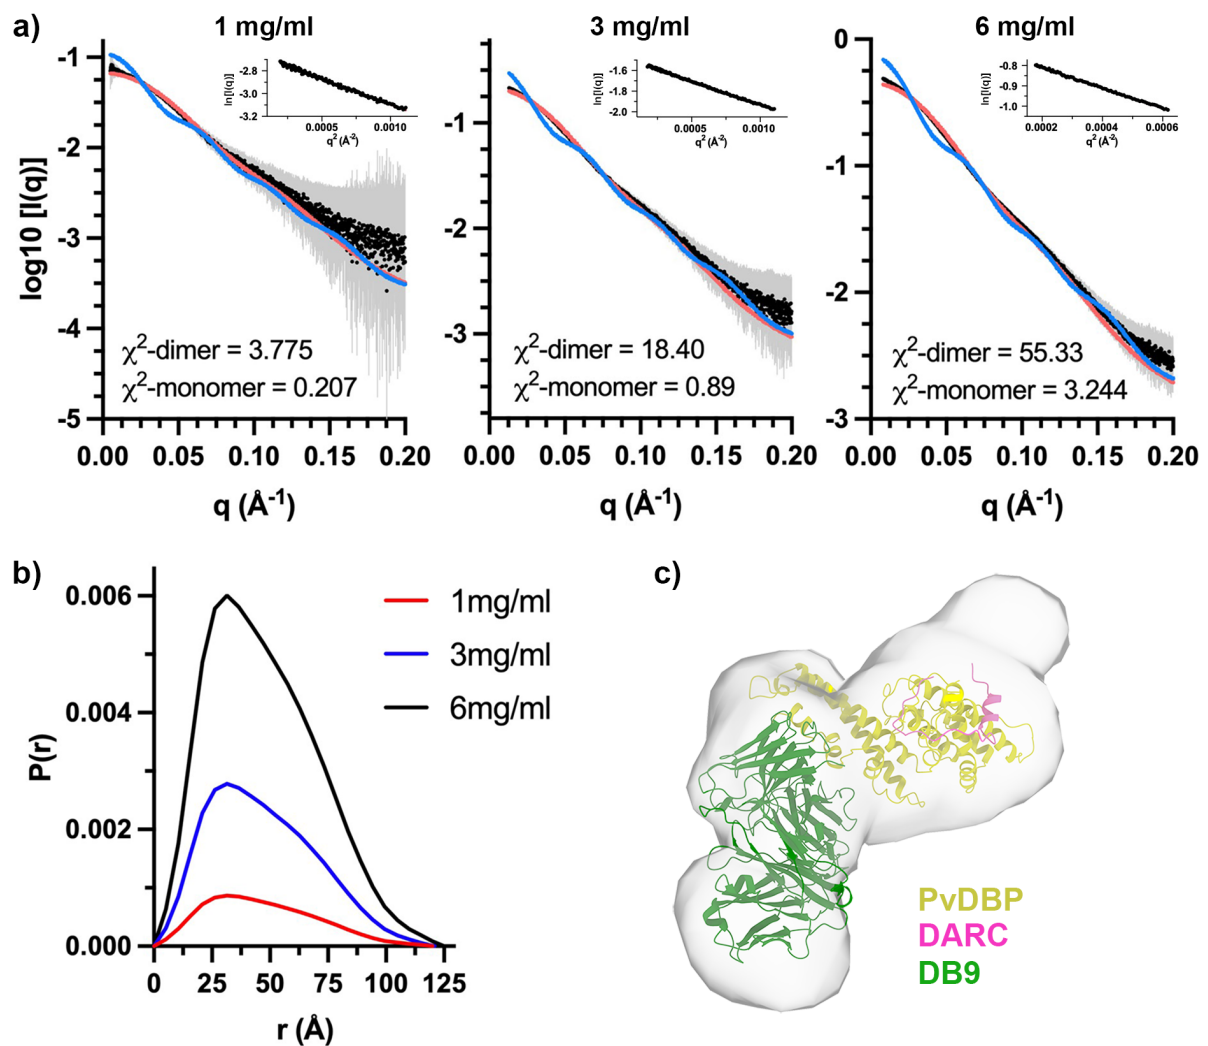

**Supplementary Figure 5: Small angle X-ray scattering data for PvDBP-R11:DARC<sub>19-47</sub>:DB9 complexes in batch model**

**a)** Small angle X-ray scattering data (SEC-SAXS) for the complex of PvDBP-R11, DARC<sub>19-47</sub> and the Fab fragment of antibody DB9 collected in batch mode at 1mg/ml (left), 3mg/ml (central) and 6mg/ml (right). In each case, a single sample was studied and the refined scattering data is shown with black circles representing the mean and error bars representing the standard error after radial averaging of intensities from two-dimensional diffraction data. This has been fitted either with the predicted scattering for the monomeric (red) or dimeric (blue) complex. The insets are the representative Guinier plots. **b)** The pair distance distribution functions for the 1mg/ml (red), 3mg/ml (blue) and 6mg/ml (black) data. **c)** The calculated envelope into which has been docked the monomeric model from the 3mg/ml data. Source data are provided as a Source Data file.
